# Supplementary material for: In situ transformation of bismuth metal–organic frameworks for efficient selective electroreduction of CO2 to formate
Source: Royal Society of Chemistry journal article supplement (doi:10.1039/d0ta08092f), 2020-01-01
Supplement: d0ta08092f1.pdf [file d0ta08092f1.pdf]

## **Electronic Supplementary Information**

### **In-situ transformation of bismuth metal-organic frameworks for efficiently selective electroreduction of CO<sub>2</sub> to formate**

Wei-Wen Yuan <sup>a</sup>, Jian-Xiang Wu <sup>a</sup>, Xiang-Da Zhang <sup>a</sup>, Shu-Zhen Hou <sup>a</sup>, Ming Xu <sup>a</sup>  
and Zhi-Yuan Gu <sup>a\*</sup>

<sup>a</sup>Jiangsu Key Laboratory of Biofunctional Materials, Jiangsu Collaborative Innovation  
Center of Biomedical Functional Materials, Jiangsu Key Laboratory of New Power  
Batteries, College of Chemistry and Materials Science, Nanjing Normal University,  
Nanjing 210023, China

\*Corresponding author: Prof. Zhi-Yuan Gu, Email: [guzhiyuan@njnu.edu.cn](mailto:guzhiyuan@njnu.edu.cn).

### Calculation details <sup>1-3</sup>

#### Potential conversion (E)

All potentials were converted to the reversible hydrogen electrode (RHE) reference scale following the equation:

$$E \text{ (vs. RHE)} = E \text{ (vs. Ag/AgCl)} + 0.19 \text{ V} + 0.0591 \text{ V} \times pH.$$

#### Faradaic efficiency (FE)

$$FE_{gas} = \frac{Q_{gas}}{Q_{total}} \times 100\% = \frac{V_a \times (10 \text{ mL/min}) \times N \times F \times 1 \text{ cm}^{-2}}{(60 \text{ s/min}) \times (24000 \text{ cm}^3/\text{mol}) \times J} \times 100\%$$

Where  $V_a$  is the volume concentration of H<sub>2</sub> or CO calculated by a calibration of the gas chromatography (GC), N=2 is the number of transferred electrons for certain product, F is the Faraday constant (96485 C mol<sup>-1</sup>), and J is the recorded current density (mA cm<sup>-2</sup>).

$$FE_{HCOO^-} = \frac{Q_{HCOO^-}}{Q_{total}} \times 100\% = \frac{n_{HCOO^-} \times N \times F}{t \times J} \times 100\%$$

Where  $n_{HCOO^-}$  is the amount of formate calculated by a calibration of the high-performance liquid chromatography (HPLC) and t is the electrochemical reaction time.

#### Electrochemically active surface areas (ECSA)

$$ECSA = R_f \times S = \frac{C_{dl}}{21 \mu\text{F}/\text{cm}^2} \times S = \frac{\Delta J}{v \times 21 \mu\text{F}/\text{cm}^2} \times S$$

S is the geometric area of the working electrode (in this work, S=1.0 cm<sup>2</sup>). R<sub>f</sub> is the roughness factor, which is obtained by double-layer capacitance  $C_{dl}$  for the working electrode and the corresponding working electrode (in this work, the average double-layer capacitance is 21 μF cm<sup>-2</sup> <sup>4</sup>).  $C_{dl}$  is estimated by plotting the  $\Delta J = (J_a - J_c)$  at 0.587 V vs. RHE, where  $J_a$  and  $J_c$  was respective the anodic and cathodic current density from cyclic voltammetry (CV) measurement in N<sub>2</sub>-saturated 0.5 M KHCO<sub>3</sub> electrolyte against v, which is the scan rate (mV s<sup>-1</sup>). The value of slope is twice that of  $C_{dl}$ . Moreover, the potentials of CVs are from 0.582 to 0.592 V vs. RHE and scan rates are from 20 to 100 mV s<sup>-1</sup>.

#### Turnover Frequency (TOF)

$$TOF = \frac{J_{total} \times FE_{HCOO^-}}{N} \times \frac{v}{Area} \times 3600 \text{ s/h}$$

Where  $J_{\text{total}}$  is the total current density,  $N=2$  is the number of transferred electrons for formate,  $v= 10 \text{ mV s}^{-1}$ , and the area is reckoned by cathodic curve in  $\text{N}_2$ -saturated situation.

### **Tafel slope**

Tafel slopes for formate production are calculated from the geometric current densities and the formate Faradaic efficiency (overpotentials versus  $\log J_{\text{HCOO}^-}$ ).

## Figures and tables

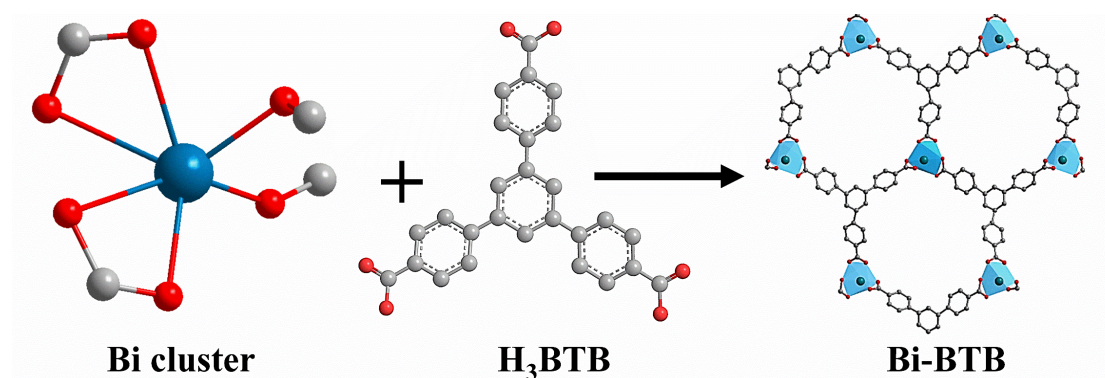

**Fig. S1** Synthetic route of Bi-BTB. Red is O, grey is C and purplish blue is Bi.

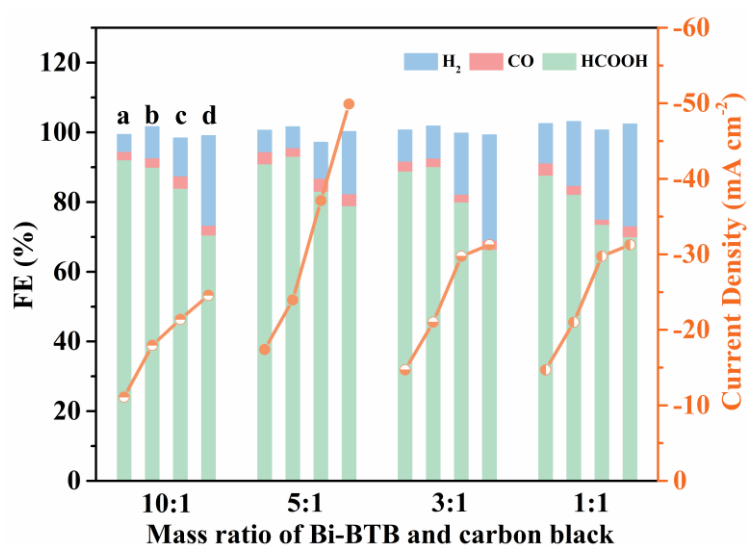

**Fig. S2** Faradaic efficiencies and total current densities over different mass ratio of Bi-BTB to carbon black at different potentials. (a, b, c and d represent the potentials at -0.719 V, -0.819 V, -0.919 V and -1.019 V vs. RHE, respectively) For the preparation of working electrodes, 1 mg Bi-BTB on each carbon paper is fixed for the quantitative optimization, meanwhile, the mass of carbon black is the variable. For example, the mass ratios for 10:1 and 5:1 represent that 1 mg Bi-BTB with 0.1 mg of carbon black and 1 mg Bi-BTB with 0.2 mg of carbon black, respectively.

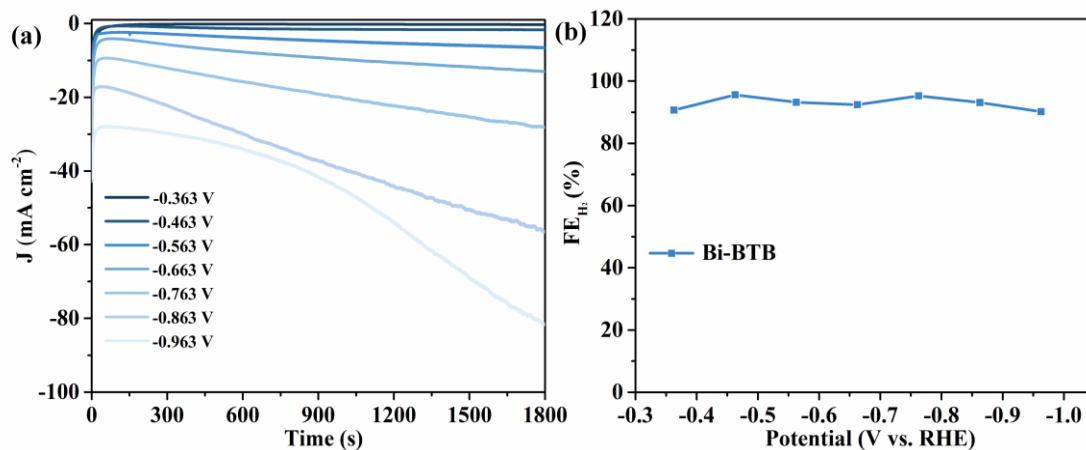

**Fig. S3** (a) Total current density of Bi-BTB in N<sub>2</sub>-saturated 0.5 M KHCO<sub>3</sub> electrolyte at different potentials from -0.363 V to -0.963 V vs. RHE as indicated. (b) Faradaic efficiencies of H<sub>2</sub> for Bi-BTB at each applied potential.

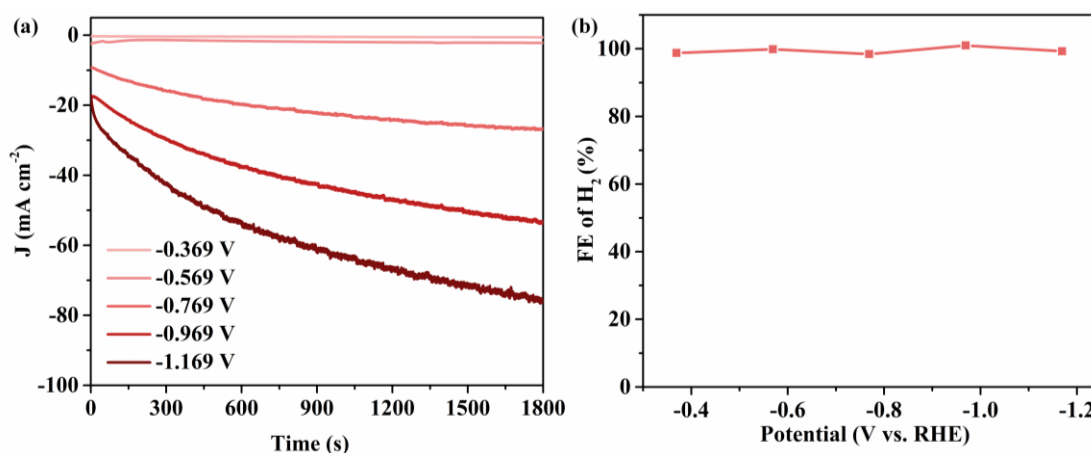

**Fig. S4** (a) Total current density of H<sub>3</sub>BTB in CO<sub>2</sub>-saturated 0.5 M KHCO<sub>3</sub> electrolyte at different potentials from -0.369 V to -1.169 V vs. RHE as indicated. (b) Faradaic efficiencies of H<sub>2</sub> for H<sub>3</sub>BTB at each applied potential.

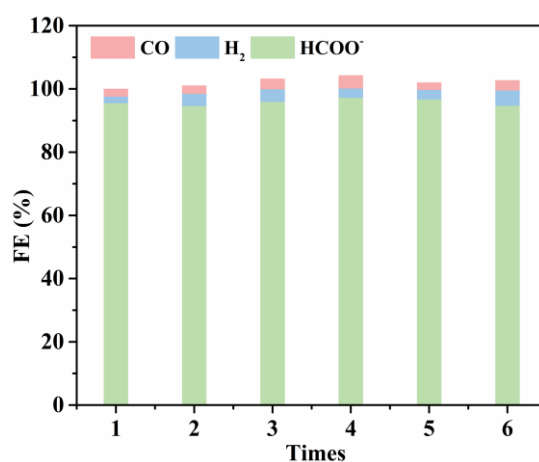

**Fig. S5** Faradaic efficiencies at -0.669 V vs. RHE using the same Bi-BTB electrode for six times.

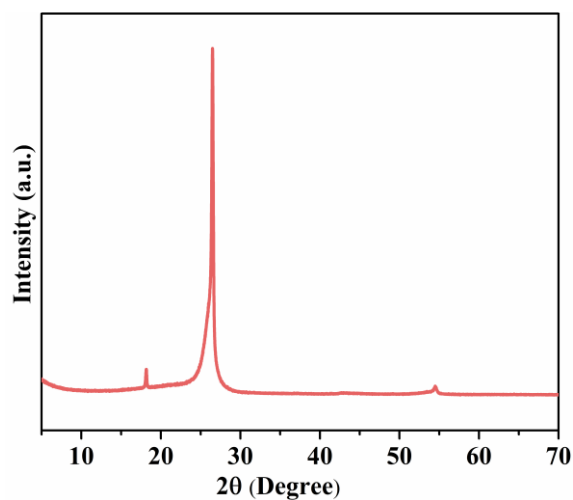

**Fig. S6** XRD pattern of carbon black dispersed on carbon paper.

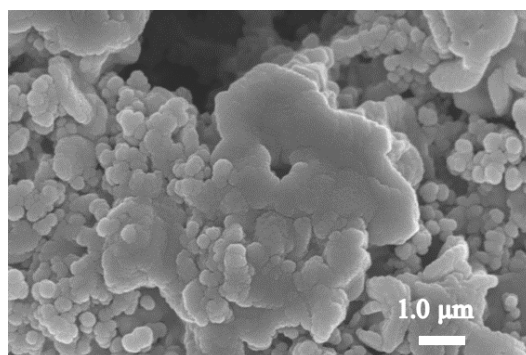

**Fig. S7** SEM image of Bi-BTB mixed with carbon black dropped on carbon paper after eCO<sub>2</sub>RR 1 h in CO<sub>2</sub>-saturated 0.5 M KHCO<sub>3</sub> electrolyte.

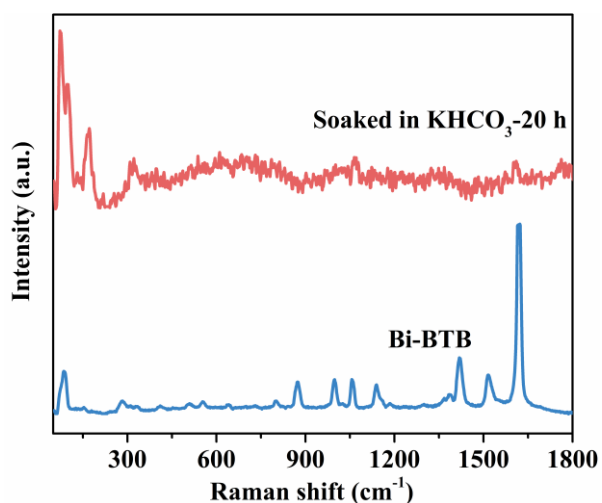

**Fig. S8** Raman scattering spectra of pristine Bi-BTB (blue) and Bi-BTB soaked in KHCO<sub>3</sub> after 20 h (red). The Raman characteristic bands at around 78, 102 and 168 cm<sup>-1</sup>, which are related to vibrational modes of Bi=O bond lattice, while the band at 1074 cm<sup>-1</sup> is assigned to symmetric stretching of CO<sub>3</sub><sup>2-</sup>.

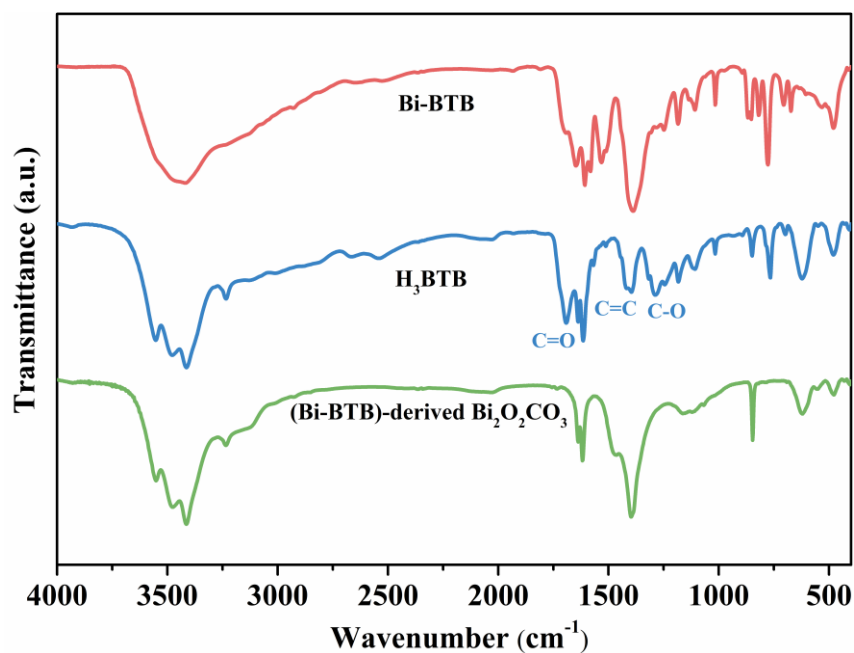

**Fig. S9** FT-IR spectrum of H<sub>3</sub>BTB, Bi-BTB, and (Bi-BTB)-derived Bi<sub>2</sub>O<sub>2</sub>CO<sub>3</sub>. For the pure ligand H<sub>3</sub>BTB, the strong absorption at 1695 cm<sup>-1</sup> is from the carboxylic acid C=O stretching vibrations. The aromatic C=C bond appears at 1421 cm<sup>-1</sup>, while the C-O bond in carboxylic acid group appears at 1288 cm<sup>-1</sup>. Compared with Bi-BTB and H<sub>3</sub>BTB, there is no carboxylic acid C=O characteristic peak of (Bi-BTB)-derived Bi<sub>2</sub>O<sub>2</sub>CO<sub>3</sub>, which can prove H<sub>3</sub>BTB ligands have been completely replaced by HCO<sub>3</sub><sup>-</sup>.

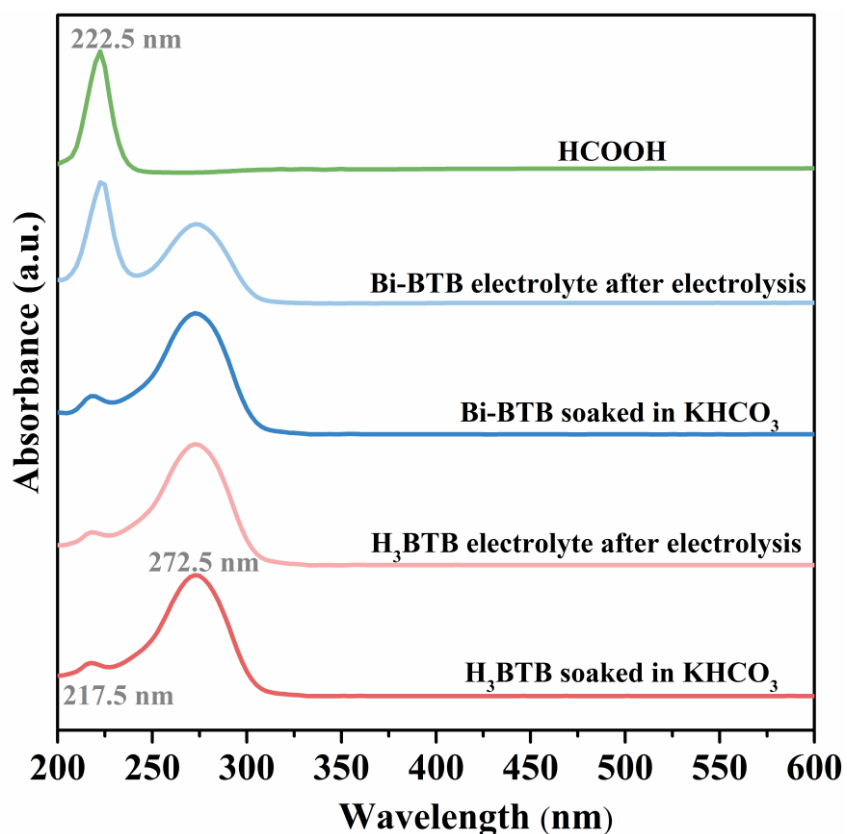

**Fig. S10** UV-vis spectra of HCOOH (green), the electrolyte of Bi-BTB/carbon paper electrode (skyblue) and H<sub>3</sub>BTB/carbon paper electrode (salmon) after electrolysis for 0.5 h, and the solution of Bi-BTB (darkblue) and H<sub>3</sub>BTB (firebrick) after soaking in electrolysis. It is noted that the experimental data are obtained under the background of deducting 0.5 M KHCO<sub>3</sub>. The characteristic absorbance peaks centered at 217.5 and 272.5 nm belong to H<sub>3</sub>BTB. Moreover, the peak centered at 222.5 nm attributes to HCOOH. The results show that H<sub>3</sub>BTB is replaced by HCO<sub>3</sub><sup>-</sup> and then exists in electrolyte during the in-situ MOFs transformation process.

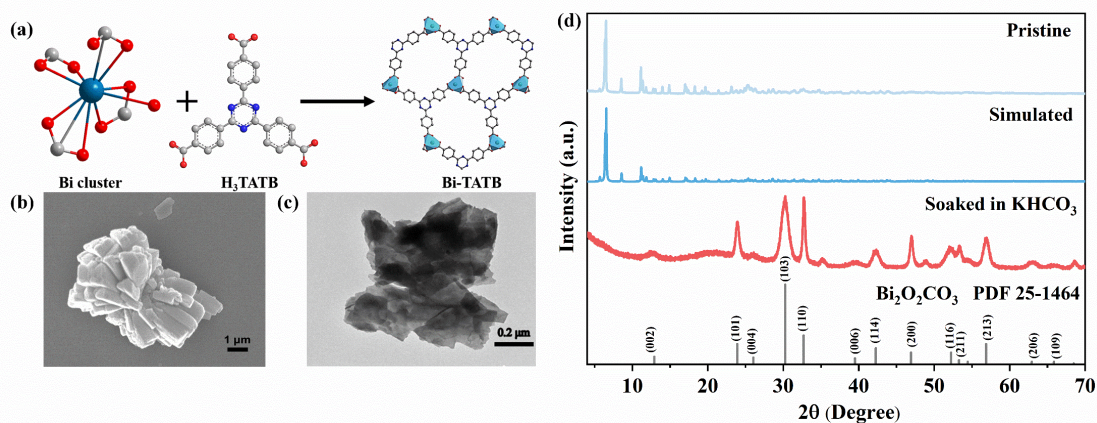

**Fig. S11** (a) Synthetic route of Bi-TATB. (b) SEM image and (c) TEM image of pristine Bi-TATB. (d) XRD patterns of pristine Bi-TATB (skyblue) and Bi-TATB after soaking in 0.5 M KHCO<sub>3</sub> electrolyte for 20 h (red). Red is O, grey is C, blue is N, and purplish blue is Bi.

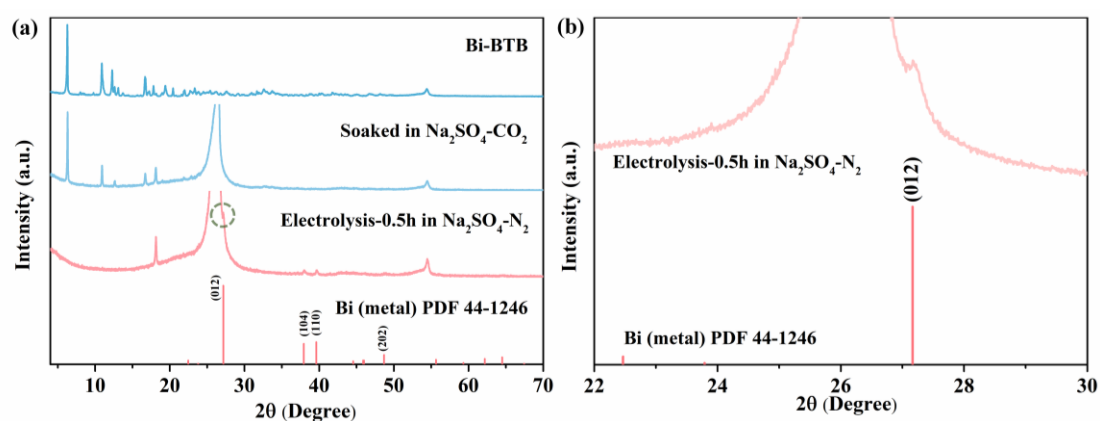

**Fig. S12** (a) XRD patterns of Bi-BTB for research on the stability after applying a reducing potential at -0.869 V vs. RHE in CO<sub>2</sub>- and N<sub>2</sub>-saturated 0.25 M Na<sub>2</sub>SO<sub>4</sub> electrolyte; (b) The magnification of the region marked by a green dotted circle in figure (a).



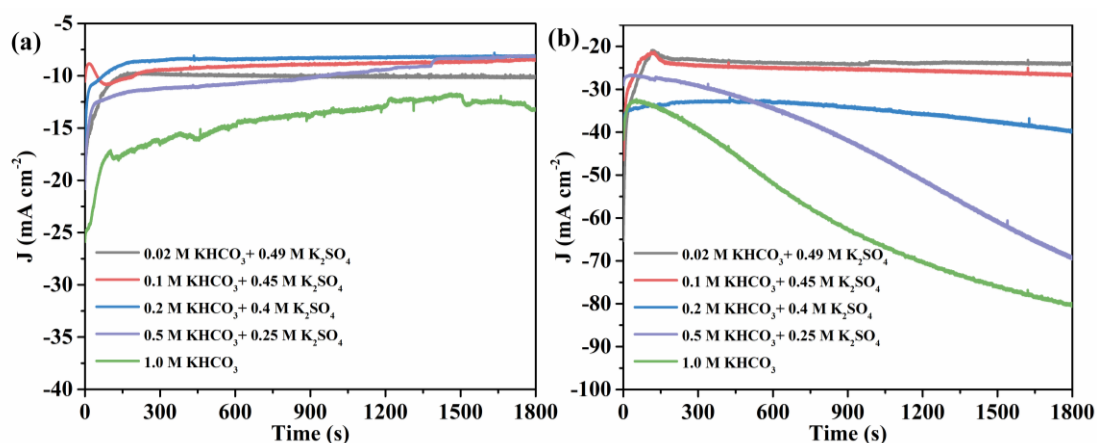

**Fig. S13** Total current density of formate versus different potassium bicarbonate concentrations at the potentials of (a) -0.669 V and (b) -1.069 V vs. RHE, respectively.

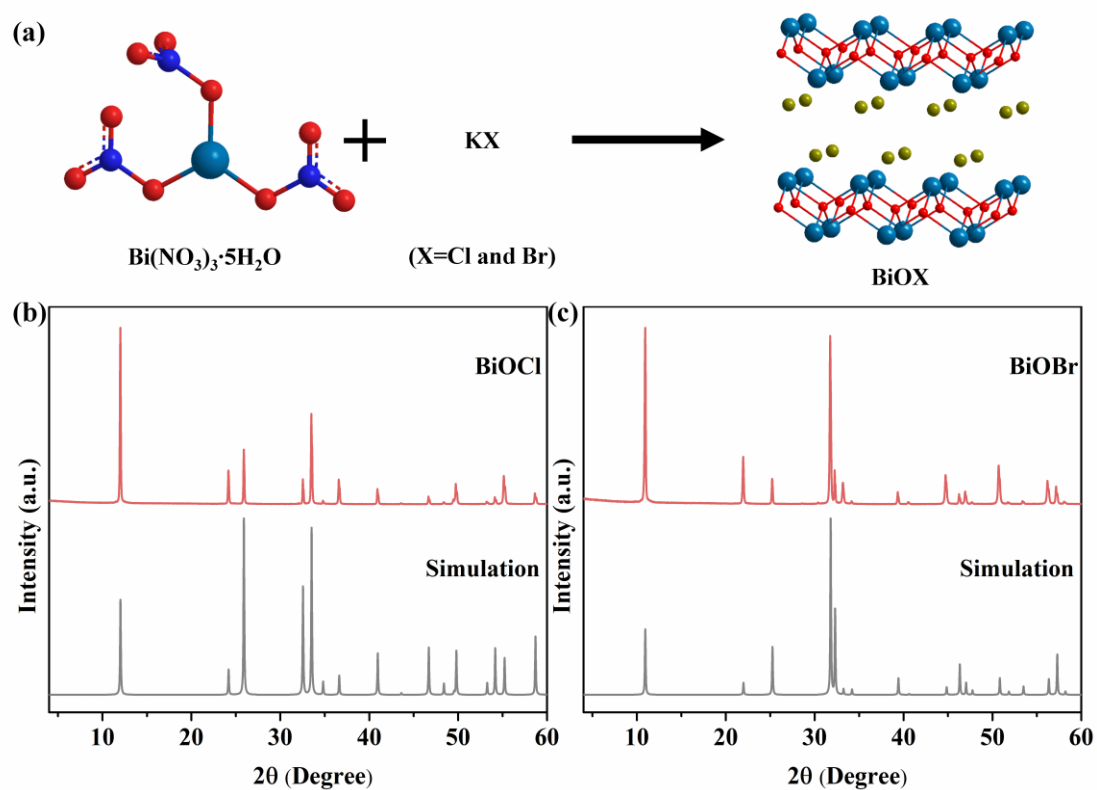

**Fig. S14** Synthetic route (a), XRD patterns of (b) BiOCl and (c) BiOBr. Red is O, grey is K, blue is N, olive is X (X= Cl and Cl Br) and purplish blue is Bi.

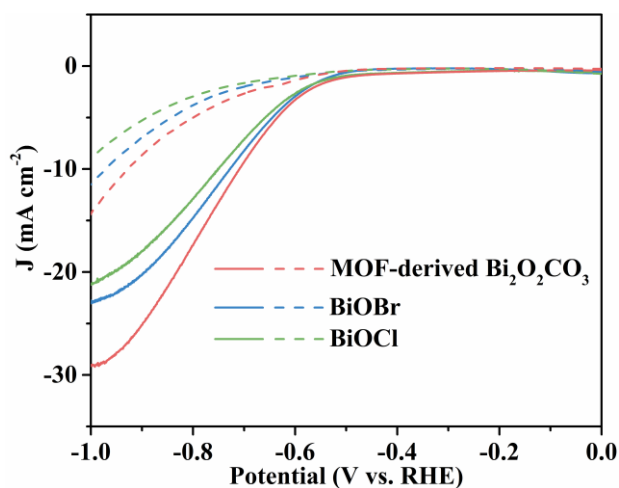

**Fig. S15** Measured LSV curves of MOF-derived  $\text{Bi}_2\text{O}_2\text{CO}_3$ ,  $\text{BiOBr}$  and  $\text{BiOCl}$  at  $10 \text{ mV s}^{-1}$ . The dotted and solid line separately reacted in  $\text{N}_2$ - and  $\text{CO}_2$ -saturated  $0.5 \text{ M KHCO}_3$  electrolyte.

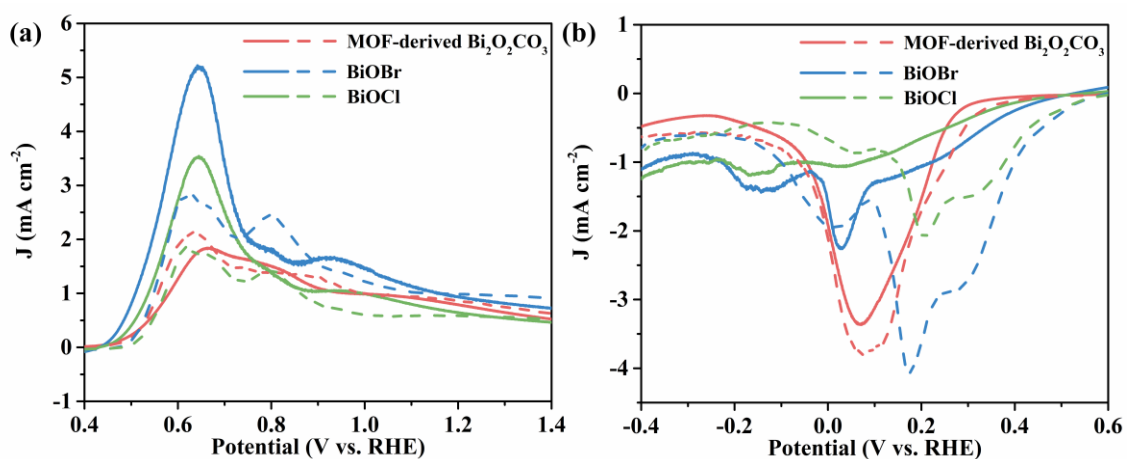

**Fig. S16** Partial enlarged (a) oxidation curves and (b) reduction curves drawings of Fig. 5a. The solid and dotted line separately reacted in  $\text{CO}_2$ - and  $\text{N}_2$ -saturated  $0.5 \text{ M KHCO}_3$  electrolyte.

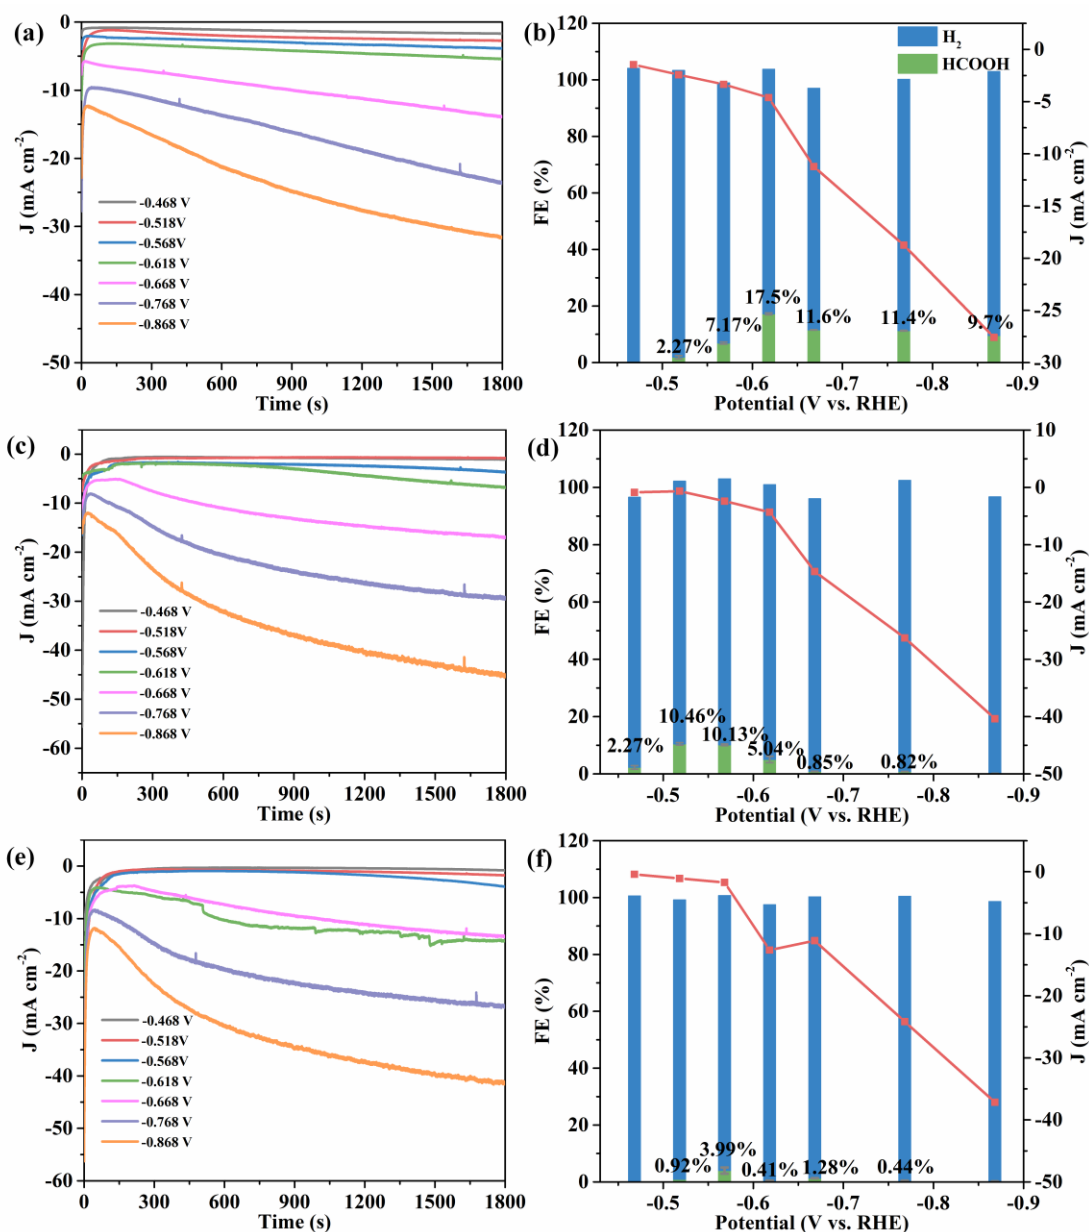

**Fig. S17** Total current densities of (a) MOF-derived  $\text{Bi}_2\text{O}_2\text{CO}_3$ , (c)  $\text{BiOBr}$  and (e)  $\text{BiOCl}$  in 15%  $\text{CO}_2$  + 85%  $\text{N}_2$  0.5 M  $\text{KHCO}_3$  electrolyte at different potentials from -0.468 V to -0.868V vs. RHE as indicated. Faradaic efficiencies of products for (b) MOF-derived  $\text{Bi}_2\text{O}_2\text{CO}_3$ , (d)  $\text{BiOBr}$  and (f)  $\text{BiOCl}$  at each applied potential.

The gas mixture with 15%  $\text{CO}_2$  and 85%  $\text{N}_2$  is controlled by the flow rate of the two gases. Selected 1.5 sccm  $\text{CO}_2$  and 8.5 sccm  $\text{N}_2$  to ensure the total flow rate is 10 sccm. The electrolyte is  $\text{N}_2$ -saturated (pH = 9.14) before the mixture gases blowing. p

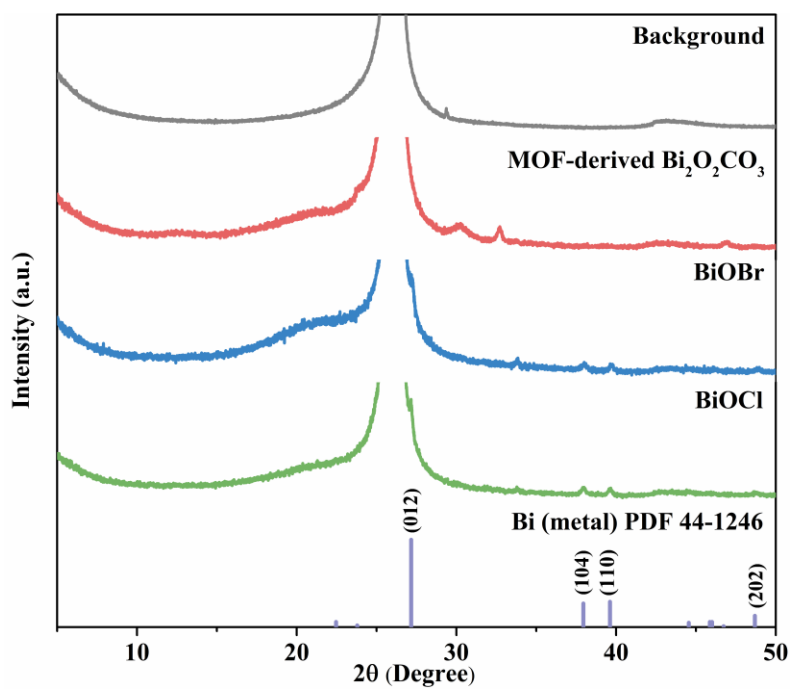

**Fig. S18** XRD patterns of MOF-derived Bi<sub>2</sub>O<sub>2</sub>CO<sub>3</sub>/carbon paper electrode (firebrick), BiOBr/carbon paper electrode (steelblue) and BiOCl/carbon paper electrode (green) after 0.5 h electrolysis at -0.669 V vs. RHE. The background is carbon paper electrode (grey). It is noted that this XRD pattern of carbon paper electrode has no peak at 18.16° compared with the Fig.3a because of using different carbon papers.

**Table S1** Summary and comparison of the catalytic performance with other electrocatalysts materials for eCO<sub>2</sub>RR to formate.

| Catalyst                                                   | Electrolyte             | Potential        | FE <sub>HCOO<sup>-</sup></sub> | Stability                               | Ref.      |
|------------------------------------------------------------|-------------------------|------------------|--------------------------------|-----------------------------------------|-----------|
| MOF-derived Bi <sub>2</sub> O <sub>2</sub> CO <sub>3</sub> | 0.5 M KHCO <sub>3</sub> | -0.669 V vs. RHE | 96.1%                          | 48 h (over 93%)                         | This work |
| Bi <sub>2</sub> O <sub>3</sub> NSs@MCCM                    | 0.1 M KHCO <sub>3</sub> | -1.265 V vs. RHE | 93.8%                          | 12 h at -0.956 V vs. RHE (around 76.3%) | 3         |
| AgBi-500                                                   | 0.1 M KHCO <sub>3</sub> | -0.7 V vs. RHE   | 94.3%                          | 12 h (over 90%)                         | 5         |
| Bi-based NPs                                               | 0.5 M KHCO <sub>3</sub> | -0.97 V vs. RHE  | 95%                            | 32 h (over 80%)                         | 6         |
| Bi NSs                                                     | 0.5 M KHCO <sub>3</sub> | -0.826 V vs. RHE | ~100%                          | 10 h (around 95%)                       | 7         |
| Bi nanostructure                                           | 0.5 M KHCO <sub>3</sub> | -0.9 V vs. RHE   | 92%                            | 10 h (over 82.35%)                      | 8         |
| Bi nanoflakes                                              | 0.1 M KHCO <sub>3</sub> | -0.8 V vs. RHE   | 90%                            | 10 h (over 90%)                         | 9         |
| [Fe <sub>4</sub> N(CO) <sub>12</sub> ] <sup>-</sup>        | 0.1 M phosphate (pH=7)  | -0.55 vs. RHE    | 95%                            | 24 h (over 90%)                         | 10        |
| In <sub>2</sub> O <sub>3</sub> -rGO                        | 0.1 M KHCO <sub>3</sub> | -1.2 V vs. RHE   | 90%                            | 10 h (over 80%)                         | 11        |
| In-BDC                                                     | 0.5 M KHCO <sub>3</sub> | -0.669 V vs. RHE | 88%                            | 21 h (over 70%)                         | 12        |
| Sn dendrite                                                | 0.1 M KHCO <sub>3</sub> | -1.36 V vs. RHE  | 83.4%                          | 18 h (over 71.6%)                       | 13        |

**Table S2** Summary and comparison of the TOF with other electrocatalysts for eCO<sub>2</sub>RR.

| Catalyst                                                   | Electrolyte                                       | Products                       | Potential                      | TOF                   | Ref.      |
|------------------------------------------------------------|---------------------------------------------------|--------------------------------|--------------------------------|-----------------------|-----------|
| MOF-derived Bi <sub>2</sub> O <sub>2</sub> CO <sub>3</sub> | 0.5 M KHCO <sub>3</sub>                           | Formate                        | -0.969 V vs. RHE               | 2207 h <sup>-1</sup>  | This work |
| [Fe <sub>4</sub> N(CO) <sub>12</sub> ] <sup>-</sup>        | 0.1 M phosphate (pH=7)                            | Formate                        | -1.2 V vs. SCE                 | 106±6 h <sup>-1</sup> | 10        |
| In-BDC                                                     | 0.5 M KHCO <sub>3</sub>                           | Formate                        | -1.069 V vs. RHE               | 4789 h <sup>-1</sup>  | 12        |
| Cu <sub>2</sub> (CuTCPP)                                   | 0.5 M KHCO <sub>3</sub>                           | Formate                        | -1.55 V vs. Ag/Ag <sup>+</sup> | 2037 h <sup>-1</sup>  | 14        |
| Cu-CB/GDL                                                  | 0.5 M KCl                                         | All products including formate | -1.1 V vs. RHE                 | 72 h <sup>-1</sup>    | 15        |
| Co protoporphyrin                                          | 1 mM HClO <sub>4</sub> + 99 mM NaClO <sub>4</sub> | CO                             | -0.8V vs. RHE                  | 2880 h <sup>-1</sup>  | 16        |
| MOF-525                                                    | 1 M TBAPF <sub>6</sub> in ACN                     | CO                             | -0.65 V vs. RHE                | 64 h <sup>-1</sup>    | 17        |
| 2D Ni(Im) <sub>2</sub> -5 nm                               | 0.5 M KHCO <sub>3</sub>                           | CO                             | -0.95 V vs. RHE                | 770 h <sup>-1</sup>   | 18        |
| CoTPP                                                      | 0.5 M KHCO <sub>3</sub>                           | CO                             | -1.35 V vs. SCE                | 288 h <sup>-1</sup>   | 19        |
| CuO/SnO <sub>2</sub>                                       | 0.1 M NaHCO <sub>3</sub>                          | CO                             | -0.9 V vs. RHE                 | 886 h <sup>-1</sup>   | 20        |
| Al <sub>2</sub> (OH) <sub>2</sub> TCPP-Co                  | 0.5 M KHCO <sub>3</sub>                           | CO                             | -0.7 V vs. RHE                 | 200 h <sup>-1</sup>   | 21        |

## Reference

- 1 E. Zhang, T. Wang, K. Yu, J. Liu, W. Chen, A. Li, H. Rong, R. Lin, S. Ji, X. Zheng, Y. Wang, L. Zheng, C. Chen, D. Wang, J. Zhang and Y. Li, *J. Am. Chem. Soc.*, 2019, **141**, 16569-16573.
- 2 N. Han, Y. Wang, L. Ma, J. Wen, J. Li, H. Zheng, K. Nie, X. Wang, F. Zhao, Y. Li, J. Fan, J. Zhong, T. Wu, D. J. Miller, J. Lu, S. T. Lee and Y. Li, *Chem*, 2017, **3**, 652-664.
- 3 S. Liu, X. F. Lu, J. Xiao, X. Wang and X. W. Lou, *Angew. Chem., Int. Ed.*, 2019, **58**, 13828-13833.
- 4 F. Yang, X. Ma, W. B. Cai, P. Song and W. Xu, *J. Am. Chem. Soc.*, 2019, **141**, 20451-20459.
- 5 J. H. Zhou, K. Yuan, L. Zhou, Y. Guo, M. Y. Luo, X. Y. Guo, Q. Y. Meng and Y. W. Zhang, *Angew. Chem., Int. Ed.*, 2019, **58**, 14197-14201.
- 6 P. Lamagni, M. Miola, J. Catalano, M. S. Hvid, M. A. H. Mamakhel, M. Christensen, M. R. Madsen, H. S. Jeppesen, X. M. Hu, K. Daasbjerg, T. Skrydstrup and N. Lock, *Adv. Funct. Mater.*, 2020, **30**, 1910408.
- 7 N. Han, Y. Wang, H. Yang, J. Deng, J. Wu, Y. Li and Y. Li, *Nat. Commun.*, 2018, **9**, 1320.
- 8 P. Lu, D. Gao, H. He, Q. Wang, Z. Liu, S. Dipazir, M. Yuan, W. Zu and G. Zhang, *Nanoscale*, 2019, **11**, 7805-7812.
- 9 S. Kim, W. J. Dong, S. Gim, W. Sohn, J. Y. Park, C. J. Yoo, H. W. Jang and J. L. Lee, *Nano Energy*, 2017, **39**, 44-52.
- 10 A. Taheri, E. J. Thompson, J. C. Fettinger and L. A. Berben, *ACS Catal.*, 2015, **5**, 7140-7151.
- 11 Z. Zhang, F. Ahmad, W. Zhao, W. Yan, W. Zhang, H. Huang, C. Ma and J. Zeng, *Nano Lett.*, 2019, **19**, 4029-4034.
- 12 S. Z. Hou, X. D. Zhang, W. W. Yuan, Y. X. Li and Z. Y. Gu, *Inorg. Chem.*, 2020, **59**, 11298-11304.
- 13 D. H. Won, C. H. Choi, J. Chung, M. W. Chung, E. H. Kim and S. I. Woo, *ChemSusChem*, 2015, **8**, 3092-3098.
- 14 J. X. Wu, S. Z. Hou, X. D. Zhang, M. Xu, H. F. Yang, P. S. Cao and Z. Y. Gu, *Chem. Sci.*, 2019, **10**, 2199-2205.
- 15 C. Ampelli, C. Genovese, B. C. Marepally, G. Papanikolaou, S. Perathoner and G. Centi, *Faraday Discuss.*, 2015, **183**, 125-145.
- 16 J. Shen, R. Kortlever, R. Kas, Y. Y. Birdja, O. D. Morales, Y. Kwon, I. L. Yanez, K. J. P. Schouten, G. Mul and M. T. M. Koper, *Nat. Commun.*, 2015, **6**, 8177.
- 17 I. Hod, M. D. Sampson, P. Deria, C. P. Kubiak, O. K. Farha and J. T. Hupp, *ACS Catal.*, 2015, **5**, 6302-6309.
- 18 J. X. Wu, W. W. Yuan, M. Xu and Z. Y. Gu, *Chem. Commun.*, 2019, **55**, 11634-11637.
- 19 X. M. Hu, M. H. Rønne, S. U. Pedersen, T. Skrydstrup and K. Daasbjerg, *Angew. Chem., Int. Ed.*, 2017, **56**, 6468-6472.
- 20 M. Schreier, F. Héroguel, L. Steier, S. Ahmad, J. S. Luterbacher, M. T. Mayer, J. Luo and M. Grätzel, *Nat. Energy*, 2017, **2**, 17087.
- 21 N. Kornienko, Y. Zhao, C. S. Kley, C. Zhu, D. Kim, S. Lin, C. J. Chang, O. M. Yaghi and P. Yang, *J. Am. Chem. Soc.*, 2015, **137**, 14129-14135.
